# Supplementary material for: Treatment of Complex Cutaneous Leishmaniasis with Liposomal Amphotericin B
Source: MDPI journal article supplement (doi:10.3390/pathogens10101253), 2021-09-28
Supplement: s1 [file s1]

**Table S1.** Local treatment and evolution of simple CL cases.

| Local Therapy<br>24 (59%)     | N=24    | Effectiveness<br>3 months | Rescue Treatment               | Effectiveness<br>12 months |
|-------------------------------|---------|---------------------------|--------------------------------|----------------------------|
| Cryotherapy                   | 8 (33%) | Cured                     |                                | Cured                      |
| Intralesional Sb <sup>v</sup> | 5 (21%) | Cured                     |                                | Cured                      |
| Combination previous          | 8 (33%) | 3 (13%) treatment failure | 1 Imiquimod 5%<br>2 Fluconazol | Cured<br>Cured             |
| Surgery                       | 1 (4%)  | Cured                     |                                | Cured                      |
| Observation                   | 2 (8%)  | Cured                     |                                | Cured                      |
|                               |         | 1 (4%) Lost follow-up     |                                | 1 (4%) Lost follow-up      |

**Table S2.** Age, comorbidities, concomitant medication, type and grade of adverse events presented in the cohort of complex CL treated with L-AmB.

| Patient | Age | Comorbidity                                        | Concomitant Medication                          | Adverse event                               | Grade | Finish Treatment | Hospitalization |
|---------|-----|----------------------------------------------------|-------------------------------------------------|---------------------------------------------|-------|------------------|-----------------|
| 1       | 49  | Arterial hypertension<br>Psoriatic arthritis       | Antihypertensive<br>Infliximab                  | Fever<br>Nausea<br>Diarrhea                 | III   | Yes              | No              |
| 2       | 66  | Inflammatory bowel disease                         | Infliximab                                      | Infusional reaction<br>Acute kidney failure | IV    | Yes              | Yes             |
| 3       | 84  | Arterial hypertension                              | Antihypertensive                                | Acute kidney failure                        | III   | Yes              | No              |
| 4       | 39  | Inflammatory bowel disease                         | Infliximab<br>Azathioprine                      | Nausea/Vomiting<br>Acute kidney failure     | IV    | No               | Yes             |
| 5       | 55  | -                                                  | -                                               | Infusional reaction                         | III   | Yes              | No              |
| 6       | 66  | Inflammatory bowel disease                         | Infliximab                                      | Infusional reaction<br>Acute kidney failure | III   | Yes              | No              |
| 7       | 8   | -                                                  | Primary CD4 deficiency                          | Nausea/Vomiting                             | III   | No               | No              |
| 8       | 11  | -                                                  | -                                               | Nausea/Vomiting                             | III   | No               | No              |
| 9       | 43  | -                                                  | -                                               | -                                           | -     | Yes              | No              |
| 10      | 69  | Psoriatic arthritis                                | Golimumab                                       | -                                           | -     | Yes              | No              |
| 11      | 45  | -                                                  | -                                               | -                                           | -     | Yes              | No              |
| 12      | 73  | Arterial hypertension<br>Dyslipidemia<br>Psoriasis | Antihypertensive<br>Hypolipemiant<br>Adalimumab | -                                           | -     | Yes              | No              |
| 13      | 36  | Primary CD4 deficiency                             | -                                               | -                                           | -     | Yes              | No              |
| 14      | 42  | -                                                  | -                                               | -                                           | -     | Yes              | No              |
| 15      | 6   | -                                                  | -                                               | -                                           | -     | Yes              | No              |
| 16      | 31  | -                                                  | -                                               | -                                           | -     | Yes              | No              |
